1 **Limited and strain-specific transcriptional and growth responses to**  
2 **acquisition of a multidrug resistance plasmid in genetically diverse**  
3 ***Escherichia coli* lineages**

4

5 Steven Dunn\*<sup>1</sup>, Laura Carrilero\*<sup>2</sup>, Michael Brockhurst<sup>2</sup>, Alan McNally<sup>1</sup>

6 \*Joint first authors contributed equally

7

8 <sup>1</sup>Institute of Microbiology and Infection, College of Medical and Dental Science,  
9 University of Birmingham, Birmingham B15 2TT

10 <sup>2</sup>Division of Evolution and Genomic Sciences, School of Biological Sciences,  
11 University of Manchester, Manchester M13 9PT

12

13

14 Running title: Transcriptional response to MDR plasmids in *E. coli*

15 **Abstract**

16 Multi-drug resistant (MDR) *Escherichia coli* are a major global threat to human health,  
17 wherein multi-drug resistance is primarily spread by MDR plasmid acquisition. MDR  
18 plasmids are not widely distributed across the entire *E. coli* species, but instead are  
19 concentrated in a small number of clones. Here, we test if diverse *E. coli* strains vary  
20 in their ability to acquire and maintain MDR plasmids, and if this relates to their  
21 transcriptional response following plasmid acquisition. We used strains from across  
22 the diversity of *E. coli*, including the common MDR lineage ST131, and the IncF  
23 plasmid, pLL35, encoding multiple antibiotic resistance genes. Strains varied in their  
24 ability to acquire pLL35 by conjugation, but all were able to stably maintain the  
25 plasmid. The effects of pLL35 acquisition on cefotaxime resistance and growth also  
26 varied among strains, with growth responses ranging from a small decrease to a small  
27 increase in growth of the plasmid-carrier relative to the parental strain. Transcriptional  
28 responses to pLL35 acquisition were limited in scale and highly strain specific. We  
29 observed significant transcriptional responses at the operon or regulon level, possibly  
30 due to stress responses or interactions with resident MGEs. Subtle transcriptional  
31 responses consistent across all strains were observed affecting functions, such as  
32 anaerobic metabolism, previously shown to be under negative frequency dependent  
33 selection in MDR *E. coli*. Overall, there was no correlation between the magnitude of  
34 the transcriptional and growth responses across strains. Together these data suggest  
35 that fitness costs arising from transcriptional disruption are unlikely to act as a barrier  
36 to dissemination of this MDR plasmid in *E. coli*.

37

38

39

40 **Importance**

41 Plasmids play a key role in bacterial evolution by transferring niche adaptive functions  
42 between lineages, including driving the spread of antibiotic resistance genes. Fitness  
43 costs of plasmid acquisition arising from the disruption of cellular processes could limit  
44 the spread of multidrug resistance plasmids. However, the impacts of plasmid  
45 acquisition are typically measured in lab-adapted strains rather than in more  
46 ecologically relevant natural isolates. Using a clinical multidrug resistance plasmid and  
47 a diverse collection of *E. coli* strains isolated from clinical infections and natural  
48 environments, we show that plasmid acquisition had only limited and highly strain-  
49 specific effects on bacterial growth and transcription. These findings suggest that  
50 fitness costs arising from transcriptional disruption are unlikely to act as a barrier to  
51 transmission of this plasmid in natural populations of *E. coli*.

52

## 53 **Introduction**

54 Multi-drug resistant (MDR) *Escherichia coli* present a global public health risk and are  
55 listed by the World Health Organisation as a priority pathogen. The incidence of MDR  
56 *E. coli* as aetiological agents of human disease has steadily increased since the turn  
57 of the century (Mathers et al., 2015). Initially this was due to the emergence of *E. coli*  
58 clones carrying plasmids containing extended spectrum beta-lactamase (ESBL)  
59 genes conferring resistance to third generation cephalosporins (Mathers et al., 2015).  
60 This emergence mirrored the rise in the incidence of *E. coli* as the causative agent of  
61 bloodstream infections world-wide, primarily due to the rapid global dissemination of  
62 MDR clones (Banerjee & Johnson, 2014; Mathers et al., 2015). This was followed by  
63 the emergence of clones carrying plasmids encoding carbapenemase enzyme genes,  
64 conferring strains resistance to all antimicrobial classes with the exception of colistin  
65 (Peirano et al., 2011; Wu et al., 2019).

66  
67 The emergence of MDR *E. coli* has not occurred evenly across this species. Rather  
68 MDR plasmid carriage is concentrated in a number of clones associated with extra-  
69 intestinal infections, whilst it is rarely seen in clones causing intestinal infectious  
70 disease or in exclusively commensal lineages (Dunn et al., 2019). ESBL plasmid  
71 carriage is most commonly seen in low-diversity clones of lineages such as ST131,  
72 ST648, and ST410 (Dunn et al., 2019), with ST131 representing the most common  
73 cause of MDR *E. coli* bloodstream and urine infections in the developed world  
74 (Banerjee & Johnson, 2014). Carriage of carbapenemase encoding plasmids is also  
75 concentrated in low-diversity clones of lineages such as ST167 and ST410, belonging  
76 to the Phylogroup A clade of *E. coli* which are generally devoid of most common *E.*  
77 *coli* virulence factors (Feng et al., 2019; Wu et al., 2019; Zong et al., 2018).

78

79 Comparison of the genomes of MDR plasmid carrying clones with the lineages that  
80 those clones emerged from shows striking similarity in key steps in their evolution. All  
81 show rapid clonal expansion of MDR plasmid carrying strains which become globally  
82 distributed in a matter of years (Feng et al., 2019; Petty et al., 2014; Zong et al., 2018).  
83 The MDR clones also carry clone specific alleles of key genes encoding traits involved  
84 in human colonisation, such as adhesins and iron acquisition (Feng et al., 2019;  
85 McNally et al., 2019; Zong et al., 2018). Comprehensive analysis of ST131 MDR clade  
86 C showed it differed from the drug susceptible clade A and B of the lineage in a number  
87 of unique alleles of genes involved in colonisation as well as anaerobic metabolism  
88 genes (McNally et al., 2019). MDR clones also contain unique intergenic-sequence  
89 alleles, which correlate with plasmids carried by strains (McNally et al., 2016)(Feng et  
90 al., 2019; Zong et al., 2018).

91

92 As well as the biosynthetic burden associated with replicating, transcribing and  
93 translating the new genetic material, plasmid acquisition often disrupts cellular  
94 homeostasis. For example, large-scale changes to regulation of chromosomal genes  
95 have been observed following plasmid acquisition in a range of bacterial hosts  
96 (Harrison et al., 2015; Millan et al., 2015; San Millan et al., 2018), which can be  
97 negated by compensatory mutations to regulators. The shared genetic traits of MDR  
98 clones of *E. coli* including regulatory sequences together with the uneven distribution  
99 of MDR plasmids, suggests that some lineages of *E. coli* may be better preadapted to  
100 the acquisition and stable integration of MDR plasmids than others, potentially  
101 suffering less cellular disruption (Dunn et al., 2019; McNally et al., 2016). However,

102 data comparing the transcriptional and phenotypic responses of diverse *E. coli* strains  
103 to MDR plasmid acquisition are lacking.

104

105 We tested the transcriptional response to acquisition of pLL35, an ESBL plasmid  
106 encoding CTX-M-15 and TEM-112, in eight genetically diverse *E. coli* strains, including  
107 environmental *E. coli* isolates from lineages in which MDR plasmids have never been  
108 reported, and strains from clade A, B and C of *E. coli* ST131, wherein clade C is most  
109 frequently associated with MDR plasmid acquisition. Strains varied in the rate of pLL35  
110 acquisition by conjugation from *K. pneumoniae* and the degree of cefotaxime  
111 resistance conferred by the plasmid but not in stability of the plasmid once acquired.  
112 pLL35 carriers showed variations in growth relative to plasmid free cells ranging from  
113 impaired to enhanced relative growth of plasmid carriers. Plasmid transcription did not  
114 vary significantly among host strains, but we observed strain specific differences in  
115 chromosomal gene expression caused by plasmid acquisition. We observed no  
116 correlation between the degree of transcriptional disruption caused by plasmid  
117 acquisition and the relative growth of pLL35 carriers.

118

## 119 **Methods and materials**

### 120 **Bacterial strains and plasmids**

121 A total of 8 *E. coli* strains were selected for use in this study, representing sequence  
122 types 131 (clades A, B, and C), 394, and 1122 (Table S1). All strains were screened  
123 to ensure that they did not contain any existing MDR plasmids. This study used  
124 plasmid donor strain LL35 (a *Klebsiella pneumoniae* isolate belonging to ST-45) which  
125 contains pLL35, a 106 kb incFII(K)-9 plasmid with a complete conjugative transfer  
126 machinery, and a complex antibiotic resistance region (Figure S1). The resistance

127 region in pLL35 is comprised of multiple translocatable genetic elements. It contains  
128 several complete antibiotic resistance genes, conferring resistance to cephalosporins  
129 and beta-lactams (*blaCTX-M-15*, *blaTEM-112*), aminoglycosides (*aacA4*, *aacC2*,  
130 *aadA1*) and quinolones (*qnrS1*). This region also contains OXA-9, however this gene  
131 is truncated due to a premature stop codon. The antibiotic resistance region is  
132 potentially mobilizable, due to an ISEcp1 insertion sequence. pLL35 also encodes two  
133 separate toxin/antitoxin systems (*higAB*, *ccdAB*).

134

### 135 **Plasmid conjugation**

136 Twelve independent conjugation assays were performed for each strain following an  
137 end-point method (Simonsen et al., 1990). A single colony from overnight growth on  
138 nutrient agar was inoculated into 5 ml of nutrient broth (Oxoid, UK). This was incubated  
139 at 37°C for 2 hours with shaking (180 rpm). Cultures were mixed at a ratio of 1:3 donor  
140 to recipient and 50 µl were used to inoculate 6 ml of BHI. Six replicates were incubated  
141 as static cultures at 37°C for 24 hours, and six replicates were incubated as shaken  
142 cultures at 37°C for 24 hours at 180 rpm. Conjugation rate data were log<sub>10</sub> transformed  
143 for statistical analysis.

144

145 The conjugation mix was plated onto UTI Chromagar (Sigma Aldrich, UK)  
146 supplemented with 4 µg/ml of cefotaxime and incubated at 37°C overnight. Colonies  
147 that produced a phenotype indicative of *E. coli* were further subcultured onto UTI  
148 Chromagar with 4 µg/ml of cefotaxime in order to check the resistance profile, and to  
149 ensure there was sufficient pure growth to store for subsequent use. One of these  
150 replicates was used to quantify differential gene expression and is subsequently  
151 referred to as the transconjugant. Whole genome sequencing (WGS) data was also

152 generated for three additional replicates from the conjugation assays, which are  
153 referred to as the transconjugant replicates.

154

155 In the generation of conjugated strains, bacteria were sub-cultured a total of 5 times.  
156 In order to account for any basal adaptation to the lab conditions, and to control for  
157 any variation generated by variables extraneous to the plasmid conjugation, the  
158 parental recipient strains were also run through the conjugation protocol with a plasmid  
159 free *Klebsiella* strain Ecl8 (Buckner et al., 2018). These triplicate samples were also  
160 sequenced and are referred to as the control replicates.

161

## 162 **Genome sequencing**

163 Whole genome sequencing was performed on the ancestral, transconjugant, control  
164 replicates and transconjugant replicate strains. The ancestral and transconjugant lines  
165 were sequenced by both Illumina and Oxford Nanopore based technologies. Illumina  
166 sequencing was provided by MicrobesNG (<http://www.microbesng.com>). Illumina  
167 genome sequence reads were assessed for quality using FastQC (V 0.11.9), and  
168 subsequently trimmed using Trimmomatic (V 0.3)14 with a sliding window quality of  
169 Q15 and length of 20 base pairs. Kraken (V 2) was used to confirm species ID and  
170 check for potential contaminants.

171

172 Long read sequencing was performed on DNA extracted using a phenol/chloroform  
173 method (Sambrook & Russell, 2006). DNA was quantified using the Qubit 4.0 and a  
174 broad range dsDNA kit (ThermoFisher, UK). Libraries were prepared using the SQK-  
175 LSK109 sequencing kit, and EXP-NBD104 expansion set. The libraries were then



176 sequenced on a MinION rev 4.1D using a R9.1 flowcell over 48 hours (Oxford  
177 Nanopore Technologies, UK).

178

179 MinION data was basecalled using GPU-accelerated Guppy (V 3.1.5+781ed57) in  
180 high accuracy mode. Adapters were confirmed and removed using Porechop (V  
181 0.2.3\_seqan2.1.1). Reads that had differential demultiplexing via Guppy and  
182 Porechop were discarded, leaving only reads for which both programs had reached a  
183 consensus. Chimeric reads were discarded using Unicycler's Scrub module (V 0.4.7).  
184 Finally, reads were filtered using FiltLong (V 0.2.0), with parameters based on read  
185 length and quality distributions generated by NanoPlot (V 1.24.0), removing relatively  
186 short or low-quality reads (e.g. lower 10% of the distribution).

187

188 Circularised assemblies were produced using both the long and short read data by  
189 Unicycler (V 0.4.7) (Wick et al., 2017). Following assembly, we ran additional rounds  
190 of Pilon (V 1.23) until no further changes were found. Assemblies were annotated  
191 using Prokka (V 1.13.3) (Seemann, 2014). Structural variants were identified using a  
192 combination of Sniffles (V 1.0.12) and Assemblytics (V 1.0). Structural variants were  
193 further filtered to high confidence calls by inspecting the BAM file and filtering to  
194 discard minor allele variants (AF <0.9). Single nucleotide variants were called against  
195 the hybrid assemblies using Snippy (V 4.3.6).

196

### 197 **Transcriptome sequencing**

198 RNA sequencing was performed on biological triplicates of the ancestral and  
199 transconjugant strains. For each replicate, a colony was picked from overnight growth  
200 on Nutrient Agar and added to 5 ml of Nutrient Broth (Sigma Aldrich, UK). Cultures  
201 were incubated at 37°C until reaching an OD600 of ~0.6. RNA was extracted using

202 Trizol (ThermoFisher, UK). Following isopropanol precipitation, DNA was digested  
203 using Turbo DNase (Thermofisher, UK) based on the manufacturer's protocol. The  
204 final RNA solution was purified using a RNeasy Mini Kit (Qiagen, UK), and quantified  
205 using a Qubit with the RNA HS assay kit. The RNA was immediately stored at -80°C.

206

207 RNA sequencing was performed by the Centre for Genomics Research (Liverpool,  
208 UK). The RNA integrity number and library insert size were verified using the Agilent  
209 RNA 6000 Pico Kit and Bioanalyzer platform (Agilent, USA). The RiboZero (Illumina,  
210 USA) kit was used to deplete rRNA, and dual indexed libraries were prepared using  
211 the NEBNext Ultra Directional RNA sequencing kit (New England Biolabs, USA).  
212 Libraries were sequenced on a HiSeq 4000 (Illumina, USA) configured to 2 x 150 bp  
213 cycles. In order to obtain at least 10 million reads per sample, the sequencing run was  
214 distributed across three lanes.

215

216 Kallisto (v 0.46.0) was used to quantify differential gene expression, with the high-  
217 quality hybrid *de novo* assemblies of parental strains used as a reference. Input files  
218 were prepared using Prokka (v 1.13.3) for annotation, `genbank_to_kallisto.py`  
219 ([https://github.com/AnnaSyme/genbank\\_to\\_kallisto.py](https://github.com/AnnaSyme/genbank_to_kallisto.py)) to convert the annotation files  
220 for use with Kallisto, and GNU-Parallel (v 20180922) for job parallelisation. Differential  
221 gene expression was analysed using Voom/Limma in Degust (V 3.20), with further  
222 processing of the resulting differential counts in R (V 3.5.3). UPGMA clustering was  
223 performed using DendroUPGMA (<http://genomes.urv.cat/UPGMA/>). Functional  
224 categories were assigned to genes using egnog-mapper (V 2).

225

226 **Plasmid persistence**

227 pLL35 encodes two TA systems and therefore is likely to be highly stable but this has  
228 not been previously measured. To quantify the persistence of the plasmid over time,  
229 4 replicate cultures of each plasmid-containing strain were propagated by daily serial  
230 transfer in nutrient broth (NB) microcosms (6 ml of NB in a 30 ml glass universal vial)  
231 for 16 days. 1% of each culture was transferred to fresh media every 24 hours.  
232 Populations were plated out onto nutrient agar  $\pm$  4 $\mu$ g/ml of cefotaxime at days 0, 1, 2,  
233 4, 7, 10, 13 and 16.

234

### 235 **Growth curves and phenotypic profiling**

236 Minimum inhibitory concentration (MIC) assays for the parental and transconjugant  
237 strains were conducted according to the CLSI guidelines (CLSI, 2012), using nutrient  
238 broth and cefotaxime. Static overnight cultures in 6 ml nutrient broth were established  
239 from independent colonies previously grown on agar plates. The following day, 0.5  
240 McFarland cell suspensions were prepared and further diluted 1/500 to inoculate 200  
241  $\mu$ l of nutrient broth in 96 well plates. The final cefotaxime concentrations tested were  
242 0.25, 0.5, 0.75, 1, 1.25, 1.5, 1.75, and thereafter two-fold increases from 2 to 2,048  
243  $\mu$ g/ml, and the final volume per well was 200  $\mu$ l (100  $\mu$ l bacterial inoculum plus 100  $\mu$ l  
244 antibiotic solution). The OD600 was recorded after 24h of static incubation at 37 °C,  
245 and normalised by subtracting the OD600 of a blank well. As working with positive  
246 OD600 values facilitates further data analysis and interpretation, we linearly  
247 transformed OD600 estimates by adding 0.0938876 to all data. For each strain and  
248 plasmid combination, the relative growth at each antibiotic concentration was obtained  
249 by dividing OD600 values in the presence of antibiotic by the OD600 of the  
250 corresponding parental strain grown in the absence of antibiotic. The relative growth  
251 values were used to calculate the area under the curve (AUC) with the auc function

252 from the R package flux (flux\_0.3-0). Statistical analysis were performed on Box Cox  
253 transformed data to fulfil ANOVA assumptions.

254

255 Growth kinetics for both plasmid-free and plasmid-containing strains were measured  
256 using cultures grown in 200 µl nutrient broth per well in a 96 well plate using an  
257 automated absorbance plate reader (Tecan Spark 10). Wells were inoculated using  
258 the same procedure described above. Plates were incubated at 37 °C for 39 hours  
259 and the optical density of each well was measured every 30 minutes at 600 nm, plates  
260 were shaken for 5s (orbital shaking, movement amplitude 3mm, 180 rpm) and allowed  
261 to settle for 50s prior to each reading. A humidity cassette was used to minimise  
262 evaporation of the samples.

263

#### 264 **Data availability**

265 Sequence data is available under bioproject PRJNA667580, and individual SRA  
266 accessions are provided in Table S1.

267

#### 268 **Results**

269

#### 270 ***E. coli* strains varied in conjugational uptake of pLL35**

271 For most strains, the conjugation rate from *K. pneumoniae* was higher in static than in  
272 shaken culture. Indeed, for several strains we detected no transconjugants from  
273 shaken cultures in any of the replicates (e.g., F022 and F047 – ST131 clade A and C,  
274 respectively), and only three strains consistently acquired the plasmid in both shaken  
275 and static conditions (i.e., F037, F048, F054 – all ST131 clade B/C – Figure S1). Due  
276 to the high number of missing replicates in shaken cultures, we were only able to

277 analyse variation across all strains in the conjugation rates estimated from static  
278 cultures. In static cultures, strains varied in their ability to acquire the plasmid by  
279 conjugation from *K. pneumoniae* (Figure S2; ANOVA, strain effect,  $F_{7,36} = 19.23$   $P =$   
280  $2.06e-10$ ). Once acquired, however, the plasmid was stably maintained over time by  
281 all strains (Figure S3; Wilcoxon test comparing population density averaged over time  
282 on media with or without cefotaxime, all strains,  $P > 0.05$ ).

283

### 284 **Strain-specific effects of pLL35 on resistance and bacterial growth kinetics.**

285 Plasmid acquisition increased resistance to cefotaxime but the level of resistance  
286 conferred by the plasmid varied by strain (Figure 1; ANOVA, strain by plasmid  
287 interaction,  $F_{7,32} = 2.968$ ,  $P = 0.000219$ ). Specifically, in strains F037, F047 and F054  
288 the plasmid provided lower levels of cefotaxime resistance than in plasmid bearers of  
289 the other strains.

290

291 Parental strains varied in their growth parameters (lag time, ANOVA,  $F_{7,32} = 5.358$ ,  $P$   
292  $= 0.000394$ ; maximum growth rate, ANOVA,  $F_{7,32} = 6.3$ ,  $P = 0.000108$ ; saturation  
293 density, ANOVA,  $F_{7,32} = 18.48$ ,  $P = 0.00000000136$ ; integral of the growth curve,  
294 Kruskal-Wallis  $\chi^2_7 = 31.759$ ,  $P = 0.000045$ ). To control for this variation in baseline  
295 growth among the strains, we normalised growth parameters per plasmid-carrying  
296 strain by its corresponding parental strain. This gave estimates of relative growth  
297 parameters, and thus of the impact of plasmid acquisition upon the growth of each  
298 strain (i.e., a value of 1 would indicate no effect on growth of plasmid acquisition;  
299 Figure 2). Strains varied in their relative maximum growth rate (ANOVA,  $F_{7,32} = 5.742$ ,  
300  $P = 0.00023$ ), relative saturation density (Kruskal-Wallis  $\chi^2_7 = 24.102$ ,  $P = 0.001093$ ),  
301 and relative integral of the growth curve (ANOVA,  $F_{7,32} = 8.998$ ,  $P = 0.00000424$ ), but

302 not in their relative lag time (Kruskal-Wallis  $\chi^2_7 = 10.264$ ,  $P = 0.1741$ ). The clearest  
303 impacts of plasmid acquisition on growth were apparent for the relative integral of the  
304 growth curve (Figure 2), which is a useful measure of the overall effect of plasmid  
305 acquisition on growth (Wright et al., 2018): The integral of the growth curve was  
306 reduced by plasmid carriage in the strains GU15 and F047 (one-sample t-test of  
307 relative integral against 1; GU15,  $t = 3.6933$ ,  $df = 4$ ,  $P = 0.021$ ; F047,  $t = 4.1762$ ,  $P =$   
308  $0.014$ ) but was increased in the strains F022 and F037 (one-sample t-test of relative  
309 integral against 1; F022,  $t = 7.0987$   $df = 4$   $P = 0.0021$ ; F037,  $t = 5.0836$ ,  $P = 0.0071$ ).  
310 Thus, acquiring the ESBL plasmid had variable effects upon growth across the strains  
311 causing both increased and decreased growth, whilst having a negligible impact upon  
312 the growth of half of the strains tested.

313

314 Following the masking of any variants that occurred in the ancestral or control  
315 sequence data, ESBL plasmid carriers contained very few SNPs, with the majority of  
316 isolates containing no SNPs at all ( $n=6$  out of 8). The position of detected SNPs was  
317 determined, but no clear evidence of parallelism could be established (Table S2). To  
318 confirm this limited genomic impact further, we sequenced three additional  
319 independently constructed transconjugant replicates. This also revealed a small  
320 number of SNPs (0-2 SNPs per replicate), with the majority of sequences containing  
321 0 variants ( $n=16$  out of 24).

322

### 323 **Strain specific transcriptional responses to acquisition of pLL35**

324 We next compared the transcriptomes of the pLL35 carrying transconjugants with their  
325 parental strain to determine the effect of plasmid acquisition on host gene expression.  
326 Combining differential gene expression analysis from three independent biological

327 replicates showed very little significant transcriptional response in any strain, with the  
328 number of significantly (>2-fold log change) differentially expressed genes ranging  
329 from 22 to zero at a false discovery rate (FDR) P-value of < 0.05 and 31 to zero at a  
330 FDR P-value of < 0.1 (Figure S3). Volcano plots for the transcriptional impact of  
331 plasmid acquisition per strain show highly strain-specific responses to acquisition of  
332 pLL35, both in terms of the level of transcriptional response and the genes that were  
333 differentially expressed (Figure 3). Strains ELU39, F104 and F037 showed no  
334 significant changes in gene expression upon acquisition of the plasmid (at FDR P-  
335 value of < 0.05 or < 0.1), strains GU15, F054 and F048 had fewer than 5 genes  
336 significantly differentially expressed, and strains F022 and F047 showed between 10  
337 and 22 genes significantly differentially expressed (at FDR P-value of < 0.05, Figure  
338 S4). There was no correlation between magnitude of transcriptional response and the  
339 growth responses observed in the strains ( $r = -0.6162$ ,  $P = 0.1038$ ).

340

#### 341 **Functions whose expression was affected by pLL35 varied between strains**

342 We observed differences in the functions whose expression was significantly affected  
343 by pLL35 acquisition between the strains. In F022 plasmid-carriers we observed  
344 upregulation of the entire class 1, 2 and 3, flagella biosynthesis regulons relative to  
345 the plasmid-free parental strain (Chilcott & Hughes, 2000). Further inspection of the  
346 genome sequences of the parental and transconjugant F022 strains revealed that this  
347 occurred due to an insertion of an IS1 family IS element in *IrhA*, the negative regulator  
348 of *flhDC* (Figure 4).

349

350 In F047, pLL35 caused upregulation of a variety of chromosomal genes, including  
351 those involved in various stress responses such as *cpxP* (envelope stress response),

352 *deaD* (low temperature response), *ibpAB* (heat and oxidative stress), and *soxS*  
353 (superoxide stress master regulator). This is mirrored in several differentially  
354 expressed genes just below the 2 log fold change significance threshold such as *dnaJ*,  
355 *degP* and *osmY* (1.81, 1.64 1.59 FC), which are all involved in stress response. The  
356 presence of plasmid also led to upregulation of *marR*, the repressor of the *mar*  
357 antibiotic resistance and oxidative stress response regulon, though *marA* expression  
358 was not significantly affected (1.0 FC, 0.57 FDR). Other functions upregulated by  
359 plasmid acquisition included metabolic transport (*mgtA*, *pstS*) and anaerobic  
360 metabolism genes (*glpD*).

361

362 In F048, several co-located hypothetical genes were upregulated in plasmid carriers,  
363 3 of these were significantly upregulated while the remainder were slightly below the  
364 FDR significance threshold. This region was further characterised with Prophage  
365 Hunter, showing a putative ~60 Kb prophage. This prophage contains 78 genes and  
366 shows 94% identity and 28% coverage with prophage CUS-3. No evidence of phage  
367 mobilisation was detected by structural variant analysis, and the read depth at this  
368 region (normalised to house-keeping genes) was consistent across both the parental  
369 and transconjugant read sets suggesting that the observed upregulation was not due  
370 to the presence of additional prophage copies.

371

372 In GU15, pLL35 led to down regulation of the entire sulfur biosynthesis and transport  
373 operons (*cysA* – *cysW*). Significant downregulation was observed in *cysA* at FDR  
374 >0.05, and genes *cysHIJKNWU* at FDR >0.1. The rest of the operon were expressed  
375 at ranges slightly below the FDR significance threshold.

376



## 377 **Consistent pattern of low-level transcriptional response to pLL35**

378 Some genes known to be in operons or regulons did not pass significance threshold  
379 in our FDR analysis, despite the rest of the operon or regulon doing so. This is due to  
380 our use of amalgamated data from three independent biological replicates and strict  
381 significance thresholds. We decided to further analyse the expression of all core genes  
382 (Figure S5) using a principal component analysis to detect genes that were  
383 differentially expressed across our host range (Figure S6). Analysis of this set of genes  
384 showed some consistent patterns of differential expression across all strains. A  
385 common pattern of upregulation in response to acquisition of pLL35 was observed for  
386 the *cit* operon, *his* operon, the *hya*, *hyb*, and *hyc* operon, and the *nar* and *ttd* operons  
387 and the *gad* loci (Figure 5). Conversely, there was a common pattern of down-  
388 regulation in response to acquisition of pLL35 of the *csg*, *gat*, *waa*, *yad*, and *yih*  
389 operons across all strains. Functional enrichment analysis of genes in the 5<sup>th</sup> and 95<sup>th</sup>  
390 percentile of these differentially expressed loci confirmed this consistent fine-scale  
391 transcriptional response to the plasmid in genes associated with the cell wall, signal  
392 transduction, cell motility, energy production and conversion, and carbohydrate  
393 transport and metabolism (Figure 5).

394

## 395 **Discussion**

396 Evidence from experimental evolution studies has provided us with a detailed picture  
397 of the impact that acquisition of plasmids and their stable integration into a host cells  
398 genetic inventory has on cell fitness (Brockhurst et al., 2019). Much of this fitness  
399 impact is driven by changes in transcription in the acquiring cell, both the need to  
400 transcribe genes on the plasmid, but also global effects on host cell transcription to  
401 offset the impact of carrying the plasmid (Buckner et al., 2018; Harrison et al., 2015;

402 Millan et al., 2015). There are very few of these studies examining the impact of  
403 acquisition of multi-drug resistance plasmids on cells from genetically diverse strains  
404 (Buckner et al., 2018), with most evidence of adaptations that occur as a result of MDR  
405 plasmid acquisition stemming from large comparative population genomics studies  
406 (Feng et al., 2019; McNally et al., 2016, 2019). Here we address this by examining the  
407 impact of acquisition of an MDR plasmid on *E. coli* from a variety of genetic  
408 backgrounds ranging from environmental lineages with no reported MDR plasmid  
409 carriage to MDR-plasmid-free clinical isolates from the ST131 lineage most commonly  
410 associated with multi-drug resistance in clinical settings.

411

412 Acquisition of the ESBL plasmid, pLL35, varied among strains, with some strains  
413 unable to successfully conjugate under shaking conditions. All strains stably  
414 maintained the plasmid once they had acquired it, likely due to the presence of two  
415 toxin-antitoxin systems on pLL35. Plasmid acquisition had variable effects on growth  
416 between strains. Notably, plasmid acquisition was not costly in terms of relative growth  
417 for all the strains, with increased growth of plasmid carriers relative to their parentals  
418 observed in two strains. This is surprising given that plasmid acquisition has been  
419 shown to be associated with fitness costs across a diversity of plasmid-host  
420 interactions, although variation in the magnitude of the cost has been described  
421 (Bouma & Lenski, 1988; Göttig et al., 2016; Kottara et al., 2018; Nang et al., 2018).  
422 However, our data are consistent with those of another recent study that tested the  
423 fitness effect of a given plasmid across the range of genetic backgrounds present in a  
424 host species. Like ours, this study revealed diverse fitness impacts ranging across a  
425 continuum from costly to beneficial (Alonso-del Valle et al., 2020). These data highlight  
426 that the fitness effects of a plasmid can be highly strain-specific, and thus are likely to

427 arise from specific genetic interactions rather than the generic biosynthetic costs of  
428 plasmid maintenance. Interestingly, effects on growth of plasmid acquisition were  
429 uncorrelated with the extent of changes in gene expression across the strains,  
430 suggesting that greater plasmid-mediated gene dysregulation does not necessarily  
431 translate to larger fitness costs.

432

433 Strains varied in the level of cefotaxime resistance provided by the ESBL plasmid.  
434 This suggests epistasis between the plasmid ESBL gene and chromosomal loci that  
435 vary among strains. Through comparison of the strain genomes we could not identify  
436 any clear differences in chromosomal gene content among strains in terms of known  
437 resistance determinants to explain the observed variation in cefotaxime resistance.  
438 For example, all strains encode the same set of standard efflux pumps with the  
439 exception of F047 and F048, which also contain *tetA*. Yet F047 and F048 differ  
440 markedly to each other in their cefotaxime resistance response, suggesting that TetA  
441 does not explain the variable resistance response. All strains encode a variant of  
442 *blaEC*. In addition, F022 and F047 encode *blaTEM-1* but vary in their cefotaxime  
443 resistance response, suggesting that *blaTEM-1* does not explain the variable  
444 resistance response. This is perhaps unsurprising as the prediction of a strain's  
445 resistance phenotype from gene content alone is notoriously inaccurate (Mahfouz et  
446 al., 2020).

447

448 Comparing the transcriptomes of plasmid-carriers with their parental strain revealed  
449 highly strain-specific effects of plasmid acquisition on the expression of chromosomal  
450 genes. The number of genes whose transcription was affected by the plasmid was  
451 small in all strains, ranging from 0 to just 22 genes (at FDR < 0.05). These data stand

452 in contrast to other studies where the expression levels of hundreds of chromosomal  
453 genes are affected by plasmid acquisition (Harrison et al., 2015; Long et al., 2019;  
454 Millan et al., 2015; Takahashi et al., 2015). Significant transcriptional effects of ESBL  
455 plasmid acquisition were focussed in discrete operons or regulons. For example, in  
456 GU15 we observed down-regulation of the sulfur biosynthesis and transport operons  
457 (*cysA – cysW*). In F048 plasmid-carriers, flavohaemoglobin (Hmp), which is  
458 responsible for resistance to nitrosative stress (Stevanin et al., 2007), was upregulated  
459 following plasmid acquisition. In F047, the transcriptional impact of plasmid acquisition  
460 was more widespread, affecting more diverse functions, but, consistent with F048,  
461 most of these were related to stress-responses. Upregulation was observed in *marR*,  
462 which did not extend to *marA*; *marA* has been demonstrated to have a short half-life  
463 (3 minutes) and is quickly depleted when the environmental stress is removed (Vinué  
464 et al., 2013). Increased expression was also observed in heat shock proteins IbpA/B.  
465 The function of IbpA/B extends beyond heat stress; previous studies have shown that  
466 increased *ibpA/B* expression resulted in the overproduction of a beta-lactamase  
467 precursor, potentially through IbpA/B binding to the precursor protein, preventing  
468 subsequent processing (Kuczyńska-Wiśnik et al., 2002). This could explain the  
469 lowered cefotaxime MIC observed, though the exact cause of *ibpA/B* upregulation is  
470 unclear. All of these factors indicate that F047 exhibited a strong stress response to  
471 acquisition of the plasmid. Plasmids are known to elicit stress responses in their host  
472 cells (San Millan et al., 2018), for example through the conjugation-mediated cell  
473 envelope stress in *E. coli* (Yang et al., 2008), or due to single stranded DNA activating  
474 the SOS response (Baharoglu et al., 2010). Additionally, pLL35 encodes DNA  
475 polymerase V genes *umuDC*, the chromosomal homologs of which are part of the  
476 SOS response regulon (Cohen et al., 2008; Fernández De Henestrosa et al., 2000).

477 Intriguingly, a plasmid-encoded *umuD* gene has previously been shown to regulate  
478 the SOS response in *Pseudomonas aeruginosa* (Díaz-Magaña et al., 2015),  
479 suggesting that plasmids may directly manipulate expression of the bacterial SOS  
480 response. It is hypothesised the production of conjugation apparatus may lead to  
481 misfolded proteins; F047 failed to conjugate in shaking conditions. This may be due to  
482 an increase in the concentration of damaged or misfolded proteins beyond that which  
483 would be mitigated by increased expression of stress response proteins (e.g. DegP,  
484 CpxP).

485

486 In two of our strains there is evidence of a transcriptional response possibly driven by  
487 the relationship between mobile genetic elements. In F022, the upregulation of  
488 flagellar and chemotaxis genes was explained by a 768 bp insertion of an IS1 family  
489 element encoding both *insA* and *insB* in the *lrhA* regulator. LrhA belongs to the lysR  
490 family and binds to and negatively regulates expression of the *flhDC* master regulator.  
491 Truncation of *lrhA* is therefore likely to have prevented negative regulation of *flhDC*,  
492 leading to uncontrolled expression of the flagellar and chemotaxis operons. Genomic  
493 comparison of IS elements within the F022 genome revealed 7 identical IS1  
494 sequences in the parental genome, with 4 found on the chromosome, and 3 on a  
495 canonical plasmid. Upon plasmid acquisition, this element inserted one additional  
496 time. This appeared to be a random event, as a similar insertion could not be detected  
497 in the short-read data of replicate transconjugants. In F048 a set of co-located  
498 upregulated genes were associated with a chromosomal prophage. Many prophages  
499 respond to host stress responses, which can be induced by plasmid acquisition and  
500 thus may explain the upregulation of prophage gene expression observed here.

501 Prophages have also been shown to excise and replicate under stress conditions, but  
502 we did not detect any excision or genomic amplification of the phage region.

503

504 Besides those genes whose expression was significantly altered by ESBL plasmid  
505 acquisition (i.e. that met the stringent significance threshold), we also observed a  
506 subtle but consistent transcriptional response to plasmid acquisition among all genes  
507 with a >2-fold log change in expression. Upon acquisition of a plasmid the most  
508 intuitive scenario would be a fall in chromosomal transcription as transcriptional  
509 machinery is sequestered at plasmid promoters (Dunn et al., 2019). Accordingly,  
510 across all strains, we observed reduction in transcription of *csg* genes encoding curli  
511 fimbriae and genes involved in cell wall and outer membrane production including the  
512 *waa* LPS core genes. These genes are involved in biosynthesis of energetically costly  
513 structures in the cell and their repression is consistent with offsetting energetic costs  
514 of plasmid maintenance. Conversely, we observed consistently increased  
515 transcription of *hya*, *hyb*, *hyc* genes encoding the hydrogenase-1 and 3 complexes,  
516 the *nar* gene encoding nitrate reductase, the *ttr* gene encoding tartrate dehydratase,  
517 and the *gad* glutamate decarboxylase operon. All of these genes are involved in  
518 various aspects of anaerobic metabolism, which is known to be important for  
519 colonising the mammalian gut. Moreover, some of these genes exhibit negative  
520 frequency dependent selection in the MDR clade C of *E. coli* ST131, which may reflect  
521 selection for enhanced intestinal colonisation (McNally et al., 2019). The observation  
522 of broad-scale, subtle changes to chromosomal gene expression caused by an MDR  
523 plasmid that are consistent across diverse bacterial lineages warrants further  
524 investigation. Their scale is suggestive of a role for plasmid-encoded regulatory

525 elements, such as small RNAs (Vial & Hommais, 2020), with the potential for genome-  
526 wide effects.

527

## 528 **Conclusion**

529 We observed strain-specific but limited effects of acquisition of an ESBL plasmid  
530 across diverse *E. coli* lineages. The transcriptional response to plasmid acquisition  
531 was limited to differential expression of small numbers of genes within discrete  
532 operons or regulons whose identity varied between strains. More subtle but consistent  
533 effects of plasmid acquisition on global transcription were observed, affecting a range  
534 of cellular processes. Relative growth and cefotaxime resistance of ESBL plasmid  
535 carriers varied between strains. Overall, our findings suggest that the effects of MDR  
536 plasmid acquisition upon the host cell arise from specific genetic interactions that are  
537 likely to be difficult to predict a priori and that fitness costs are unlikely to act as a  
538 barrier to transmission of this MDR plasmid in natural populations of *E. coli*.

539

## 540 **Acknowledgements**

541 This work was funded by a BBSRC project grant [BB/R006261/1 & BB/R006253/1]  
542 jointly awarded to AM and MB respectively.

543

## 544 **Figures**

545 **Figure 1 – The level of resistance to cefotaxime conferred by the pLL35 varied**  
546 **by strain.** Plots are faceted by *E. coli* strain. Solid lines show the mean (n=3) ±  
547 standard error of relative growth measured using optical density (OD) at 600 nm with  
548 (red) or without (blue) pLL35 across gradients of increasing cefotaxime concentration.  
549 Horizontal dashed lines indicate a relative growth value of 0.5, i.e., the MIC<sub>50</sub>.

550

551

552 **Figure 2 – The effect of acquiring pLL35 on bacterial growth kinetics varied by**  
553 **strain.** Panels show the response of the following growth parameters to plasmid  
554 acquisition: (A) lag time, (B) maximum growth rate, (C) maximum density, and (D)  
555 integral (i.e. area under the growth curve). Boxes show normalised values (plasmid-  
556 carrying strain value divided by parental strain value) for each strain (n=5) indicating  
557 the performance of plasmid carriers relative to their parental strain where a value of 1  
558 represents equal performance. The lower hinge of the box denotes the 25<sup>th</sup> percentile,  
559 the upper hinge denotes the 75<sup>th</sup> percentile, and the line within the box indicates the  
560 median. Upper whiskers extend to the highest value no further than 1.5 times the inter-  
561 quartile range from the hinge. Lower whiskers extend to the smallest value no further  
562 than 1.5 times the inter-quartile range from the hinge. Points indicate outliers beyond  
563 the whiskers.

564

565 **Figure 3 – Transcriptional responses to acquiring pLL35 varied by strain.** Log<sub>2</sub>  
566 fold change (CTX) of differentially expression data and their statistical significance (-  
567 log<sub>10</sub> of the P-value). Whilst 4 of the 8 isolates showed no significant transcriptional  
568 differences, other isolates showed patterns of differential expression in discrete  
569 operons, or in genes under the control of a common regulator. The transcriptomic  
570 effects observed in this host range are determined by strain, rather than host genetic  
571 background. Blue = Significant Fold Change (>2) OR Significant P value (<0.05), Red  
572 = Also FDR Significant at a threshold of <0.10, Green = Also FDR Significant at a  
573 threshold of <0.05, Black = Not significant.

574



575 **Figure 4 – Transcriptional response of strain F022 was likely caused by a**  
576 **chromosomal insertion of an IS element.** A) Parental genome sequence with fully  
577 intact *lrhA* gene. B) Transconjugant genome sequence with an IS1 family transposase  
578 sequence causing a truncation to *lrhA*. C) IS1 family transposase with left and right  
579 inverted repeat sequences, and a 9 base pair target site duplication. This particular  
580 IS1 occurs 7 times in the parental strain, and has inserted one additional time upon  
581 plasmid conjugation. Querying the ISfinder database shows that this IS1 shares 97%  
582 sequence identity with IS1 R, B and D. This element encodes two ORFs, *insA* and  
583 *insB*. D) Depth of long reads uniquely mapped to the transconjugant assembly. The  
584 minimum depth of reads that were successfully mapped to this region is 50, and in the  
585 parental isolate there are 0 reads that map to the IS1 transposase.

586

587 **Figure 5 – Transcriptional change of genes from the extremes of the PCA**  
588 **distribution show some common signatures of differential expression** (e.g. *cit*  
589 operon, *his* operon, the *hya*, *hyb*, and *hyc* operon, and the *nar*, *gad* and *ttd* operons).  
590 Genes were extracted from the 5<sup>th</sup> and 95<sup>th</sup> percentile of the PCA distribution from  
591 figure S6 (i.e. genes extraneous to the central distribution). These genes were  
592 assigned to COGS functional categories, with each category ordered via UPGMA  
593 clustering of the expression data.

594

#### 595 **Supplementary Material**

596 **Figure S1 – CTX-M-15 containing plasmid pLL35.** A) Genomic map of pLL35 showing  
597 a complete transfer region including a full suite of conjugation machine (*tra* locus), and  
598 a complex antibiotic resistance region that confers resistance to cephalosporins,  
599 aminoglycosides and quinolones. Within this region, OXA-9 is found to contain a

600 premature stop codon. pLL35 was found to contain a novel IS element flanked by a 5  
601 bp terminal site duplication (TCCTG). B) Schematic of the resistance region, which  
602 contains Tn1331b that is interrupted by a 2971 bp insertion of ISEcp1 containing a  
603 1315 bp passenger section that includes CTX-M-15.

604

605 **Figure S2** – Conjugational uptake of pLL35 varied with *E. coli* strain and culturing  
606 conditions. Open symbols show mean  $\pm$  standard error of  $\log_{10}$  conjugation rate for  
607 each strain and culturing condition. Colour denotes culturing condition (shaken culture  
608 = green; static culture = orange). Individual replicate values are shown as different  
609 symbol shapes. Symbols are jittered to prevent over-plotting.

610

611

612 **Figure S3** – **Stable maintenance of pLL35 in all *E. coli* strains.** Plots are faceted  
613 horizontally by strain. Lines show the mean (n=4)  $\pm$  standard error (shaded area)  
614 bacterial population densities over time from colony forming unit counts on nutrient  
615 agar plates to give the whole population (blue) or nutrient agar plates supplemented  
616 with 4  $\mu\text{g/ml}$  of cefotaxime to give the plasmid-carrier fraction of the population (red).

617

618 **Figure S4** – **The magnitude of the transcriptional response to pLL35 acquisition**  
619 **varied by strain.** A) Number of genes that were significantly (FDR <0.05) differentially  
620 expressed (>2 log fold change). B) Number of genes that were significantly (FDR  
621 <0.10) differentially expressed (>2 log fold change). Red = number of genes  
622 upregulated, Blue = number of genes that were downregulated.

623

624 **Figure S5 – Global transcriptional response of ~779 core genes across all**  
625 **strains, sorted by functional cog category.** Gene order is determined via UPGMA  
626 clustering of log<sub>2</sub> transcriptional changes. A = Cellular processes and signalling, B =  
627 Metabolism , C = Information storage and processing, D = Poorly characterised. The  
628 isolates vary in their transcriptional response to the plasmid in a strain dependent  
629 manner, however a large number of metabolism genes can be seen to increase in  
630 transcription across all strains. Isolate F022, belonging to ST-131 Clade A -which is  
631 not typically associated with MDR plasmids – exhibits the most disparate differential  
632 expression profile.

633

634 **Figure S6 – PCA distributions of expression values from functionally**  
635 **categorised core genes.** A = Cellular processes and signalling, B = Metabolism , C  
636 = Information storage and processing. D shows how each isolate is contributing to the  
637 PCA distribution. This data highlights which genes exhibit the greatest level of  
638 differential expression amongst the isolates, with several candidates in each larger  
639 COG category. Panel D recapitulates the phylogenetic relatedness of isolates, with  
640 environmental isolates, MDR associated and non-associated lineages appearing  
641 together.

642

643 **Table S1 –** Accession numbers for all read data associated with this study.

644

645 **Table S2 –** Variants detected in transconjugant strains and their impact on host  
646 transcription, and variants detected in independent conjugation replicates. Positions  
647 highlighted in bold occur in multiple replicates.

648

649  
650

## References

- 651 Alonso-del Valle, A., León-Sampedro, R., Rodríguez-Beltrán, J., Hernández-García,  
652 M., Ruiz-Garbajosa, P., Cantón, R., San Millán, Á., Spain, M., & Peña-Miller, R.  
653 (2020). The distribution of plasmid fitness effects explains plasmid persistence  
654 in bacterial. *BioRxiv*, 2020.08.01.230672.  
655 <https://doi.org/10.1101/2020.08.01.230672>
- 656 Baharoglu, Z., Bikard, D., & Mazel, D. (2010). Conjugative DNA transfer induces the  
657 bacterial SOS response and promotes antibiotic resistance development  
658 through integron activation. *PLoS Genetics*.  
659 <https://doi.org/10.1371/journal.pgen.1001165>
- 660 Banerjee, R., & Johnson, J. R. (2014). A New Clone Sweeps Clean: the Enigmatic  
661 Emergence of *Escherichia coli* Sequence Type 131. *Antimicrobial Agents and*  
662 *Chemotherapy*, 58(9), 4997–5004. <https://doi.org/10.1128/AAC.02824-14>
- 663 Bouma, J. E., & Lenski, R. E. (1988). Evolution of a bacteria/plasmid association.  
664 *Nature*, 335(6188), 351–352. <https://doi.org/10.1038/335351a0>
- 665 Brockhurst, M. A., Harrison, E., Hall, J. P. J., Richards, T., McNally, A., & MacLean,  
666 C. (2019). The Ecology and Evolution of Pangenomes. *Current Biology : CB*,  
667 29(20), R1094–R1103. <https://doi.org/10.1016/j.cub.2019.08.012>
- 668 Buckner, M. M. C., Saw, H. T. H., Osagie, R. N., McNally, A., Ricci, V., Wand, M. E.,  
669 Woodford, N., Ivens, A., Webber, M. A., & Piddock, L. J. V. (2018). Clinically  
670 Relevant Plasmid-Host Interactions Indicate that Transcriptional and Not  
671 Genomic Modifications Ameliorate Fitness Costs of *Klebsiella pneumoniae*  
672 Carbapenemase-Carrying Plasmids. *MBio*, 9(2).  
673 <https://doi.org/10.1128/mBio.02303-17>
- 674 Chilcott, G. S., & Hughes, K. T. (2000). Coupling of flagellar gene expression to

- 675 flagellar assembly in *Salmonella enterica* serovar typhimurium and *Escherichia*  
676 *coli*. *Microbiology and Molecular Biology Reviews* : *MMBR*, 64(4), 694–708.  
677 <https://doi.org/10.1128/membr.64.4.694-708.2000>
- 678 CLSI. (2012). *Methods for Dilution Antimicrobial Test for Bacteria that Grow*  
679 *Aerobically. M7-A*. Wayne, PA.
- 680 Cohen, S. E., Foti, J. J., Simmons, L. A., & Walker, G. C. (2008). The SOS  
681 Regulatory Network. *EcoSal Plus*, 3(1). <https://doi.org/10.1128/ecosalplus.5.4.3>
- 682 Díaz-Magaña, A., Alva-Murillo, N., Chávez-Moctezuma, M. P., López-Meza, J. E.,  
683 Ramírez-Díaz, M. I., & Cervantes, C. (2015). A plasmid-encoded UmuD  
684 homologue regulates expression of *Pseudomonas aeruginosa* SOS genes.  
685 *Microbiology (United Kingdom)*, 161(7), 1516–1523.  
686 <https://doi.org/10.1099/mic.0.000103>
- 687 Dunn, S. J., Connor, C., & McNally, A. (2019). The evolution and transmission of  
688 multi-drug resistant *Escherichia coli* and *Klebsiella pneumoniae*: the complexity  
689 of clones and plasmids. In *Current Opinion in Microbiology* (Vol. 51, pp. 51–56).  
690 <https://doi.org/10.1016/j.mib.2019.06.004>
- 691 Feng, Y., Liu, L., Lin, J., Ma, K., Long, H., Wei, L., Xie, Y., McNally, A., & Zong, Z.  
692 (2019). Key evolutionary events in the emergence of a globally disseminated,  
693 carbapenem resistant clone in the *Escherichia coli* ST410 lineage.  
694 *Communications Biology*, 2, 322. <https://doi.org/10.1038/s42003-019-0569-1>
- 695 Fernández De Henestrosa, A. R., Ogi, T., Aoyagi, S., Chafin, D., Hayes, J. J.,  
696 Ohmori, H., & Woodgate, R. (2000). Identification of additional genes belonging  
697 to the LexA regulon in *Escherichia coli*. *Molecular Microbiology*, 35(6), 1560–  
698 1572. <https://doi.org/10.1046/j.1365-2958.2000.01826.x>
- 699 Göttig, S., Riedel-Christ, S., Saleh, A., Kempf, V. A. J., & Hamprecht, A. (2016).

- 700 Impact of blaNDM-1 on fitness and pathogenicity of Escherichia coli and  
701 Klebsiella pneumoniae. *International Journal of Antimicrobial Agents*, 47(6),  
702 430–435. <https://doi.org/10.1016/j.ijantimicag.2016.02.019>
- 703 Harrison, E., Guymer, D., Spiers, A. J., Paterson, S., & Brockhurst, M. A. (2015).  
704 Parallel Compensatory Evolution Stabilizes Plasmids across the Parasitism-  
705 Mutualism Continuum. *Current Biology*, 25(15), 2034–2039.  
706 <https://doi.org/10.1016/j.cub.2015.06.024>
- 707 Kottara, A., Hall, J. P. J., Harrison, E., & Brockhurst, M. A. (2018). Variable plasmid  
708 fitness effects and mobile genetic element dynamics across Pseudomonas  
709 species. *FEMS Microbiology Ecology*, 94(1), 172.  
710 <https://doi.org/10.1093/femsec/fix172>
- 711 Kuczyńska-Wiśnik, D., Kędzierska, S., Matuszewska, E., Lund, P., Taylor, A.,  
712 Lipińska, B., & Laskowska, E. (2002). The Escherichia coli small heat-shock  
713 proteins IbpA and IbpB prevent the aggregation of endogenous proteins  
714 denatured in vivo during extreme heat shock. *Microbiology*, 148(6), 1757–1765.  
715 <https://doi.org/10.1099/00221287-148-6-1757>
- 716 Long, D., Zhu, L. L., Du, F. L., Xiang, T. X., Wan, L. G., Wei, D. D., Zhang, W., & Liu,  
717 Y. (2019). Phenotypical profile and global transcriptomic profile of Hypervirulent  
718 Klebsiella pneumoniae due to carbapenemase-encoding plasmid acquisition.  
719 *BMC Genomics*, 20(1), 480. <https://doi.org/10.1186/s12864-019-5705-2>
- 720 Mahfouz, N., Ferreira, I., Beisken, S., von Haeseler, A., & Posch, A. E. (2020).  
721 Large-scale assessment of antimicrobial resistance marker databases for  
722 genetic phenotype prediction: a systematic review. *Journal of Antimicrobial*  
723 *Chemotherapy*. <https://doi.org/10.1093/jac/dkaa257>
- 724 Mathers, A. J., Peirano, G., & Pitout, J. D. D. (2015). The role of epidemic resistance

- 725 plasmids and international high-risk clones in the spread of multidrug-resistant  
726 Enterobacteriaceae. *Clinical Microbiology Reviews*, 28(3), 565–591.  
727 <https://doi.org/10.1128/CMR.00116-14>
- 728 McNally, A., Kallonen, T., Connor, C., Abudahab, K., Aanensen, D. M., Horner, C.,  
729 Peacock, S. J., Parkhill, J., Croucher, N. J., & Corander, J. (2019).  
730 Diversification of Colonization Factors in a Multidrug-Resistant *Escherichia coli*  
731 Lineage Evolving under Negative Frequency-Dependent Selection. *MBio*, 10(2).  
732 <https://doi.org/10.1128/mBio.00644-19>
- 733 McNally, A., Oren, Y., Kelly, D., Pascoe, B., Dunn, S., Sreecharan, T., Vehkala, M.,  
734 Välimäki, N., Prentice, M. B., Ashour, A., Avram, O., Pupko, T., Dobrindt, U.,  
735 Literak, I., Guenther, S., Schaufler, K., Wieler, L. H., Zhiyong, Z., Sheppard, S.  
736 K., ... Corander, J. (2016). Combined Analysis of Variation in Core, Accessory  
737 and Regulatory Genome Regions Provides a Super-Resolution View into the  
738 Evolution of Bacterial Populations. *PLoS Genetics*, 12(9), e1006280.  
739 <https://doi.org/10.1371/journal.pgen.1006280>
- 740 Millan, A. S., Toll-Riera, M., Qi, Q., & MacLean, R. C. (2015). Interactions between  
741 horizontally acquired genes create a fitness cost in *Pseudomonas aeruginosa*.  
742 *Nature Communications*, 6. <https://doi.org/10.1038/ncomms7845>
- 743 Nang, S. C., Morris, F. C., McDonald, M. J., Han, M. L., Wang, J., Strugnell, R. A.,  
744 Velkov, T., & Li, J. (2018). Fitness cost of *mcr-1*-mediated polymyxin resistance  
745 in *Klebsiella pneumoniae*. *Journal of Antimicrobial Chemotherapy*, 73(6), 1604–  
746 1610. <https://doi.org/10.1093/jac/dky061>
- 747 Peirano, G., Schreckenberger, P. C., & Pitout, J. D. D. (2011). Characteristics of  
748 NDM-1-Producing *Escherichia coli* Isolates That Belong to the Successful and  
749 Virulent Clone ST131. *Antimicrobial Agents and Chemotherapy*, 55(6), 2986–

- 750 2988.
- 751 Petty, N. K., Zakour, N. L. Ben, Stanton-Cook, M., Skippington, E., Totsika, M.,  
752 Forde, B. M., Phan, M. D., Moriel, D. G., Peters, K. M., Davies, M., Rogers, B.  
753 A., Dougan, G., Rodriguez-Baño, J., Pascual, A., Pitout, J. D., Upton, M.,  
754 Paterson, D. L., Walsh, T. R., Schembri, M. A., & Beatson, S. A. (2014). Global  
755 dissemination of a multidrug resistant *Escherichia coli* clone. *Proc Natl Acad Sci*  
756 *U S A*, *doi/10.107*.
- 757 Sambrook, J., & Russell, D. W. (2006). Purification of Nucleic Acids by Extraction  
758 with Phenol:Chloroform. *Cold Spring Harbor Protocols*.  
759 <https://doi.org/10.1101/pdb.prot4455>
- 760 San Millan, A., Toll-Riera, M., Qi, Q., Betts, A., Hopkinson, R. J., McCullagh, J., &  
761 MacLean, R. C. (2018). Integrative analysis of fitness and metabolic effects of  
762 plasmids in *Pseudomonas aeruginosa* PAO1. *The ISME Journal*, *12*(12), 3014–  
763 3024. <https://doi.org/10.1038/s41396-018-0224-8>
- 764 Seemann, T. (2014). Prokka: rapid prokaryotic genome annotation. *Bioinformatics*,  
765 *30*(14), 2068–2069. <https://doi.org/10.1093/bioinformatics/btu153>
- 766 Simonsen, L., Gordon, D. M., Stewart, F. M., & Levin, B. R. (1990). Estimating the  
767 rate of plasmid transfer: An end-point method. *Journal of General Microbiology*,  
768 *136*(11), 2319–2325. <https://doi.org/10.1099/00221287-136-11-2319>
- 769 Stevanin, T. M., Read, R. C., & Poole, R. K. (2007). The hmp gene encoding the  
770 NO-inducible flavohaemoglobin in *Escherichia coli* confers a protective  
771 advantage in resisting killing within macrophages, but not in vitro: Links with  
772 swarming motility. *Gene*, *398*(1-2 SPEC. ISS.), 62–68.  
773 <https://doi.org/10.1016/j.gene.2007.03.021>
- 774 Takahashi, Y., Shintani, M., Takase, N., Kazo, Y., Kawamura, F., Hara, H., Nishida,



- 775 H., Okada, K., Yamane, H., & Nojiri, H. (2015). Modulation of primary cell  
776 function of host *Pseudomonas* bacteria by the conjugative plasmid pCAR1.  
777 *Environmental Microbiology*, 17(1), 134–155. [https://doi.org/10.1111/1462-](https://doi.org/10.1111/1462-2920.12515)  
778 2920.12515
- 779 Vial, L., & Hommais, F. (2020). Plasmid-chromosome cross-talks. *Environmental*  
780 *Microbiology*, 22(2), 540–556. <https://doi.org/10.1111/1462-2920.14880>
- 781 Vinué, L., Mcmurry, L. M., & Levy, S. B. (2013). The 216-bp marB gene of the  
782 marRAB operon in *Escherichia coli* encodes a periplasmic protein which  
783 reduces the transcription rate of marA. *FEMS Microbiology Letters*.  
784 <https://doi.org/10.1111/1574-6968.12182>
- 785 Wick, R. R., Judd, L. M., Gorrie, C. L., & Holt, K. E. (2017). Unicycler: Resolving  
786 bacterial genome assemblies from short and long sequencing reads. *PLoS*  
787 *Computational Biology*, 13(6), e1005595.  
788 <https://doi.org/10.1371/journal.pcbi.1005595>
- 789 Wright, R. C. T., Friman, V.-P., Smith, M. C. M., & Brockhurst, M. A. (2018). Cross-  
790 resistance is modular in bacteria-phage interactions. *PLoS Biology*, 16(10),  
791 e2006057. <https://doi.org/10.1371/journal.pbio.2006057>
- 792 Wu, W., Feng, Y., Tang, G., Qiao, F., McNally, A., & Zong, Z. (2019). NDM Metallo-  
793 beta-Lactamases and Their Bacterial Producers in Health Care Settings. *Clinical*  
794 *Microbiology Reviews*, 32(2). <https://doi.org/10.1128/CMR.00115-18>
- 795 Yang, X., Ma, Q., & Wood, T. K. (2008). The R1 conjugative plasmid increases  
796 *Escherichia coli* biofilm formation through an envelope stress response. *Applied*  
797 *and Environmental Microbiology*, 74(9), 2690–2699.  
798 <https://doi.org/10.1128/AEM.02809-07>
- 799 Zong, Z., Fenn, S., Connor, C., Feng, Y., & McNally, A. (2018). Complete genomic

800 characterization of two *Escherichia coli* lineages responsible for a cluster of  
801 carbapenem-resistant infections in a Chinese hospital. *Journal of Antimicrobial*  
802 *Chemotherapy*, 73(9), 2340–2346. <https://doi.org/10.1093/jac/dky210>

803  
804

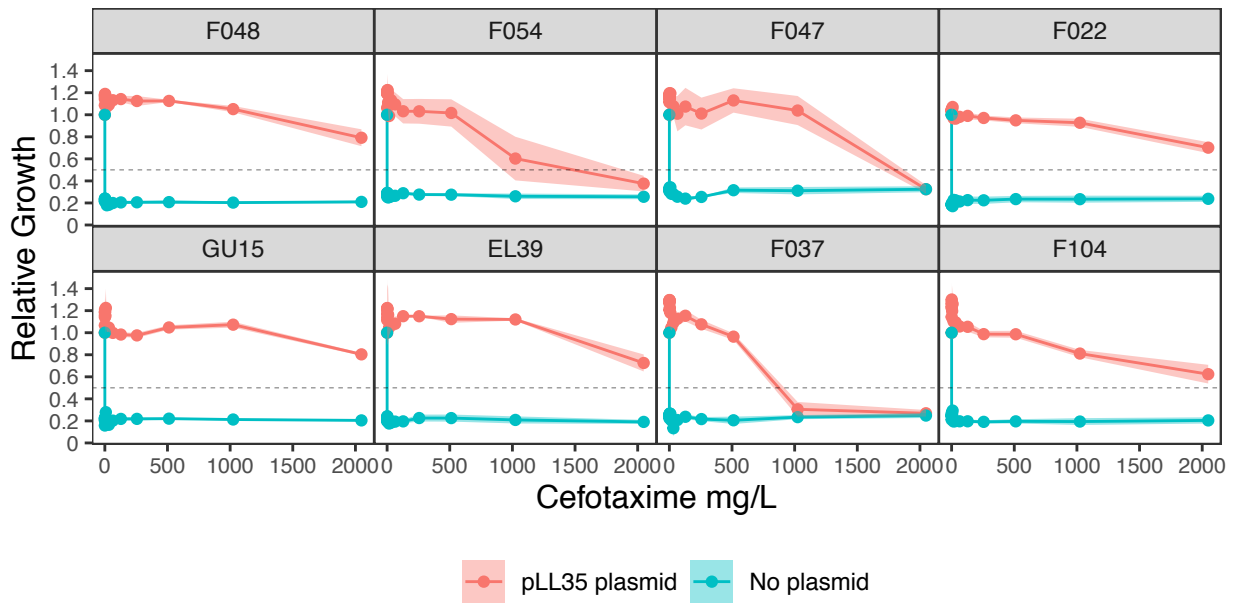

805

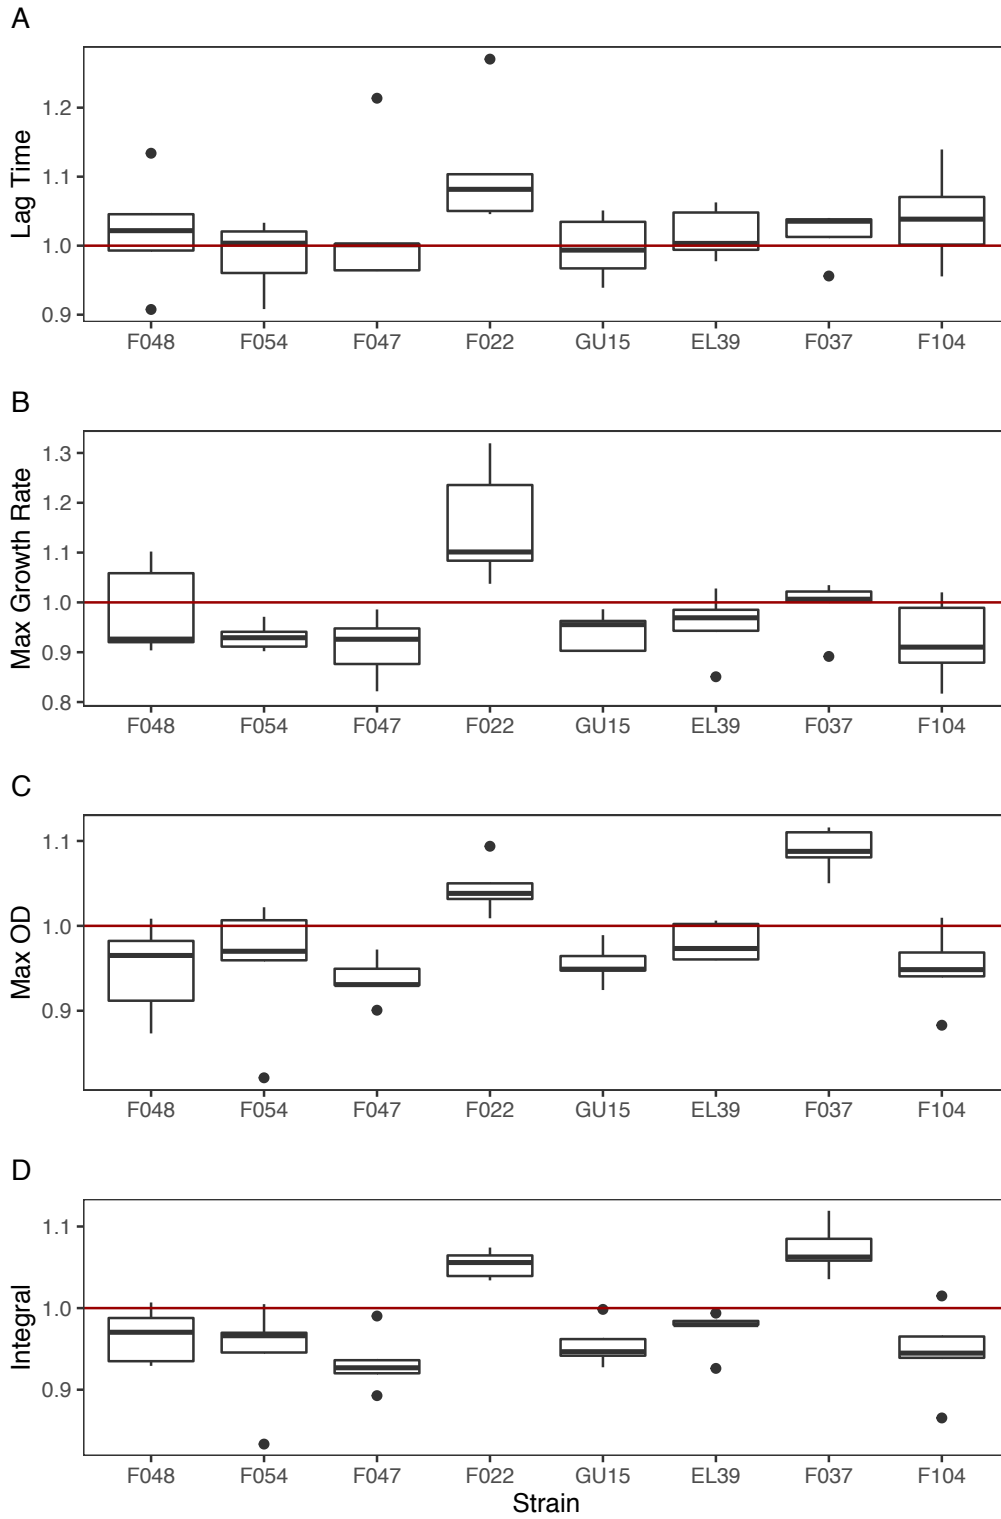



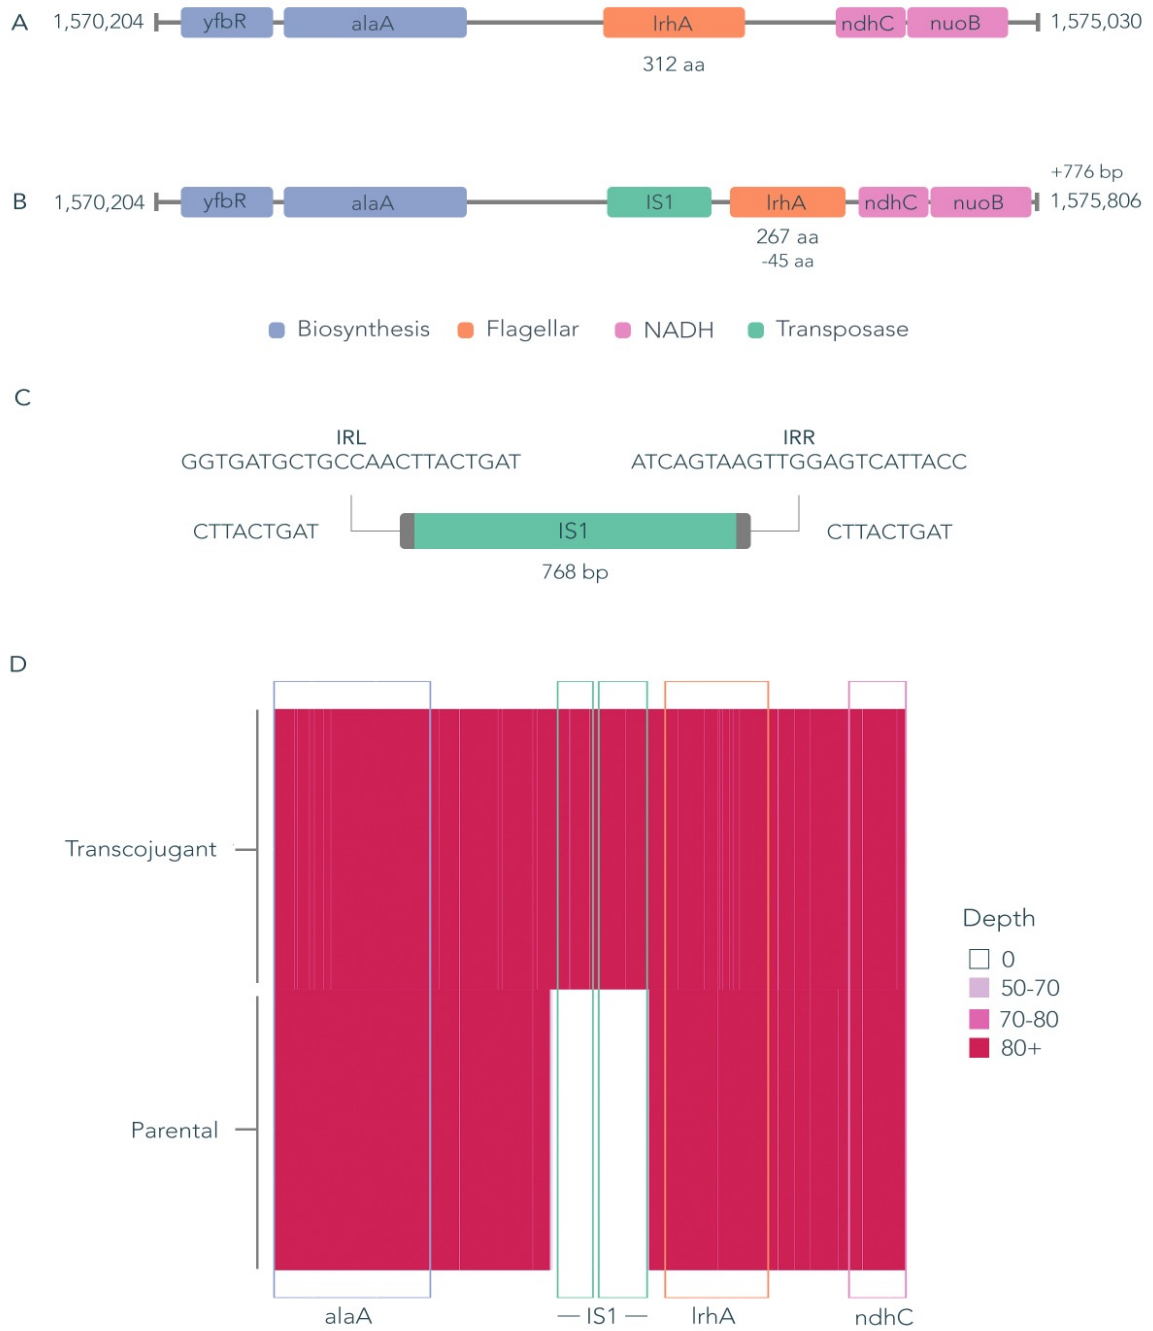

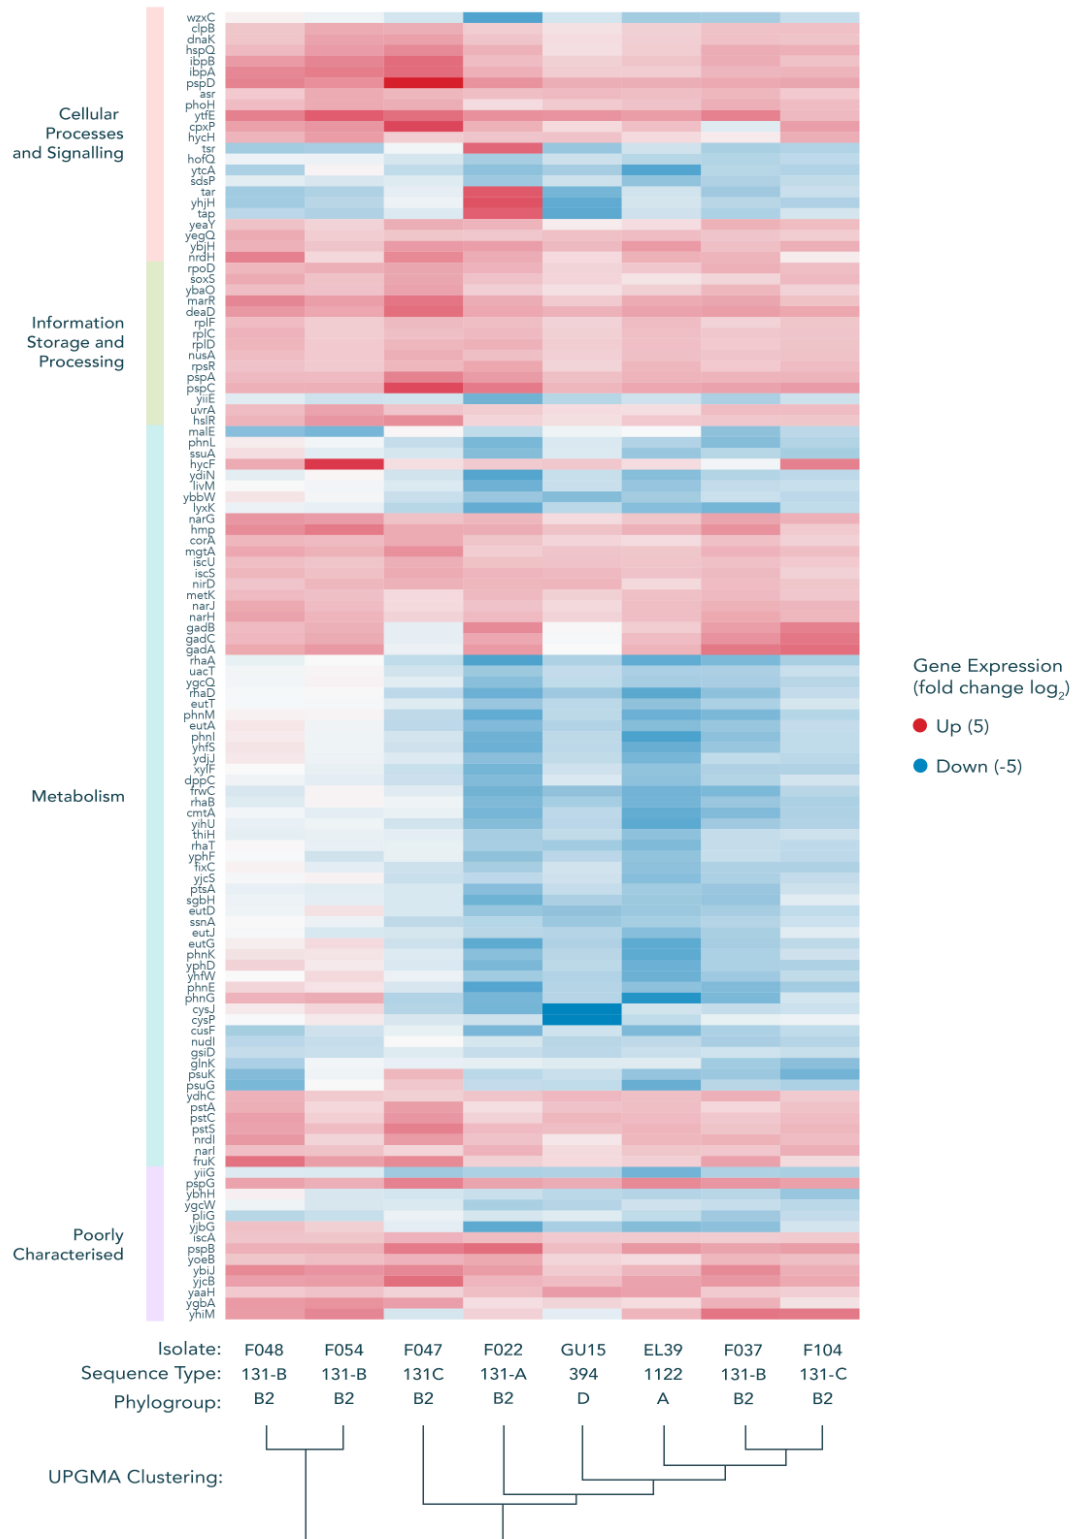

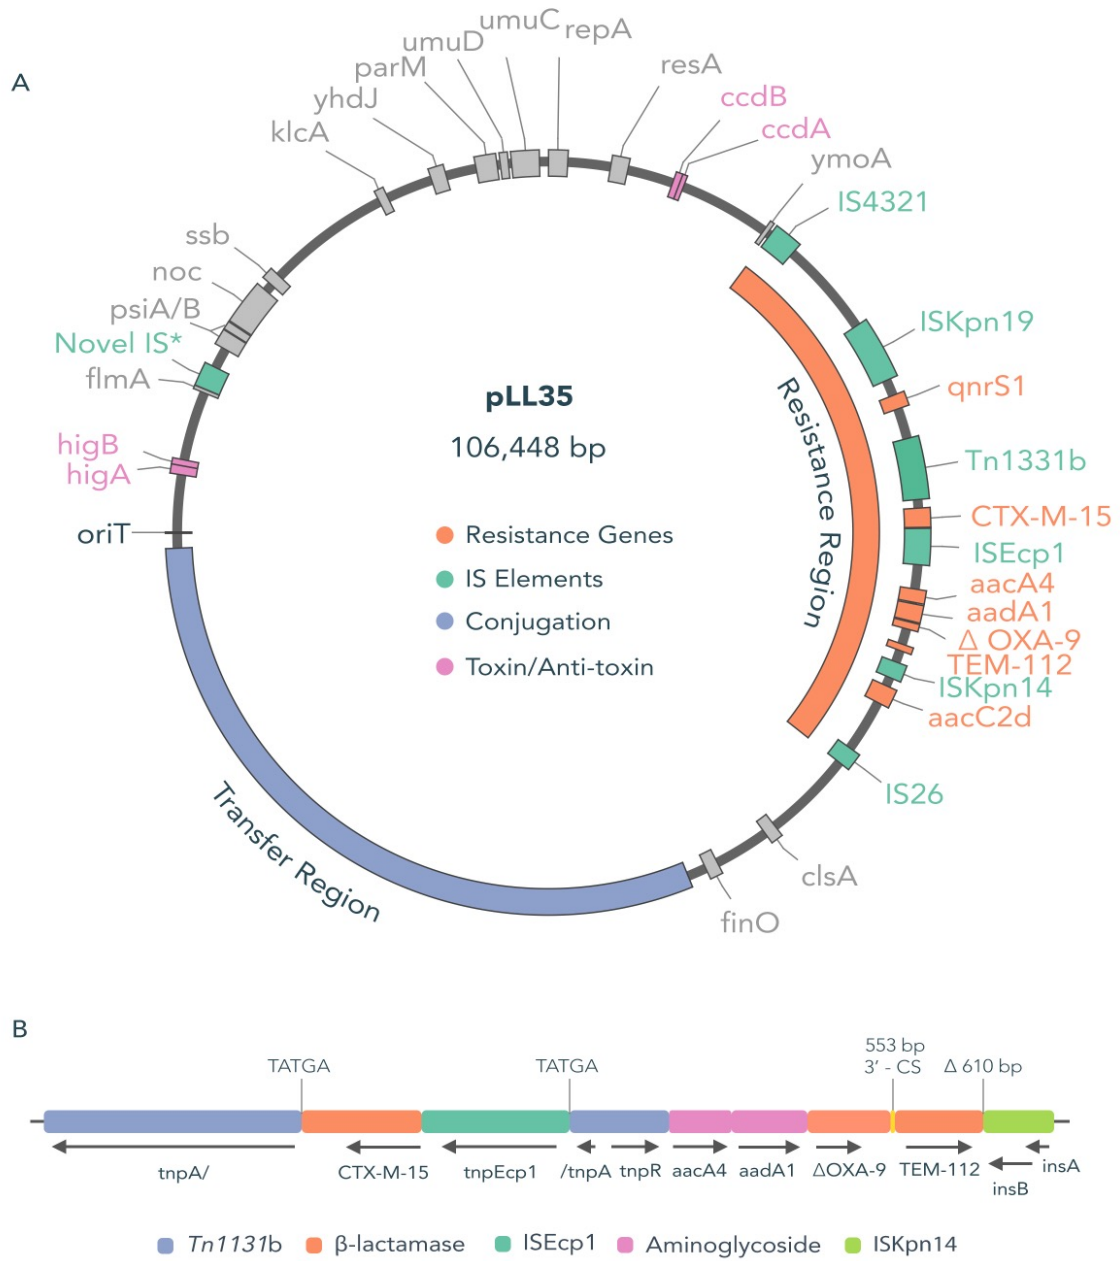

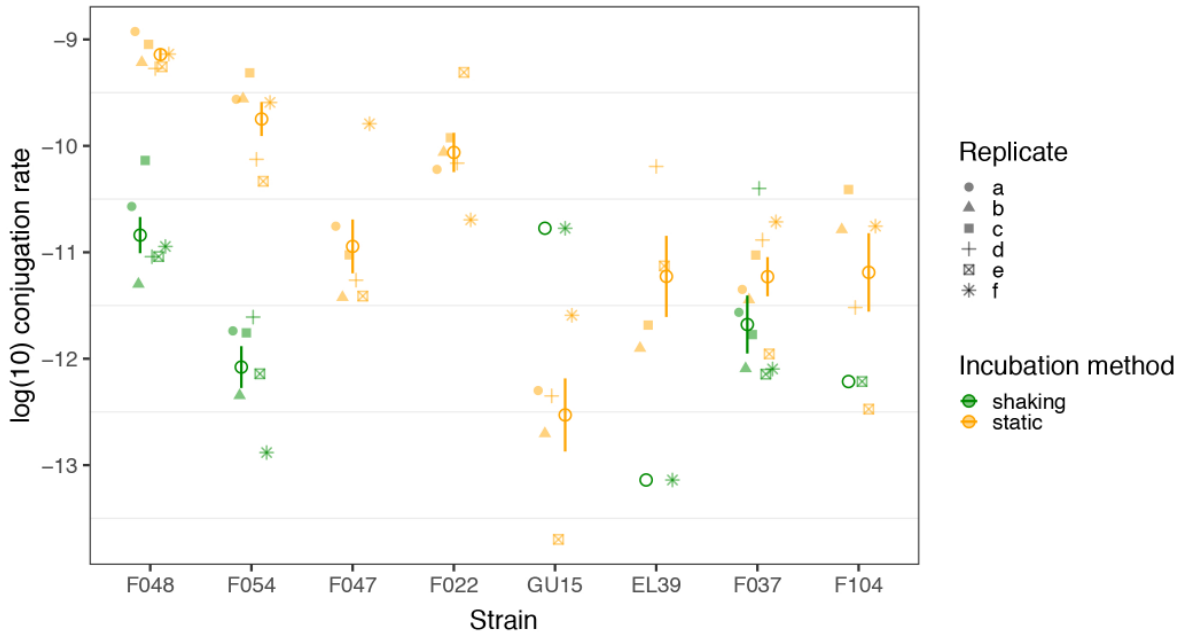

811

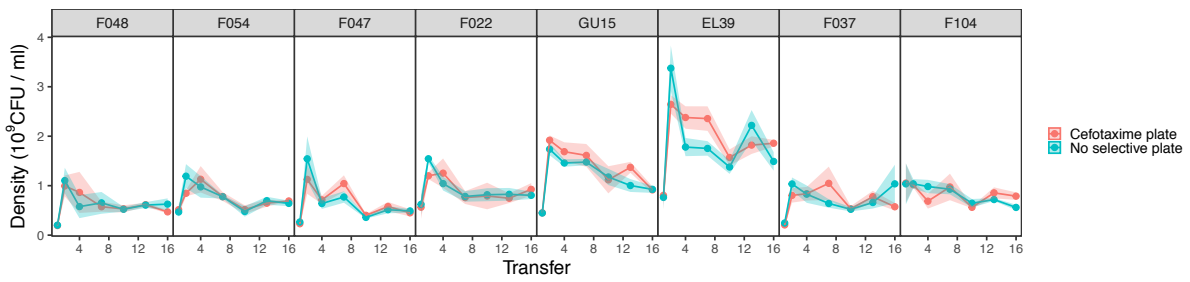

812

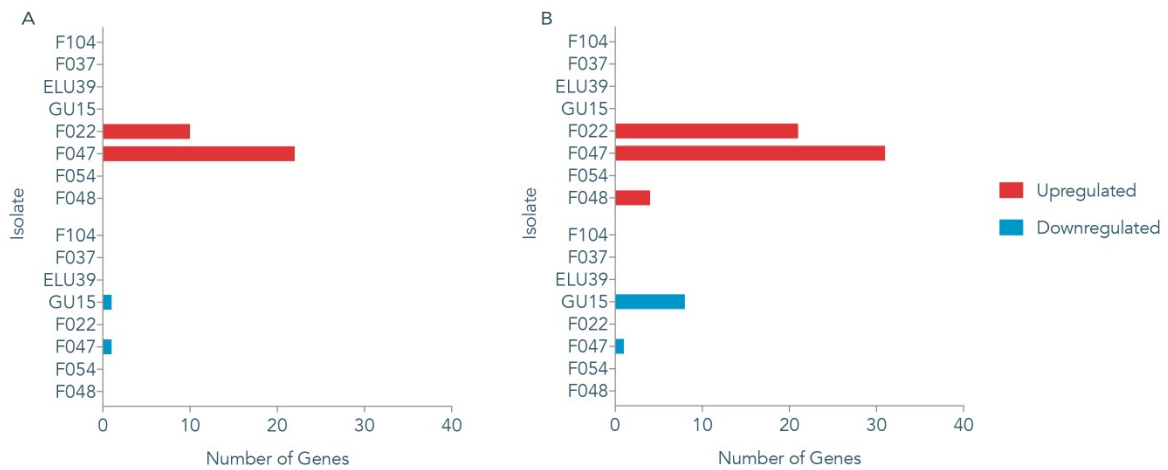

813



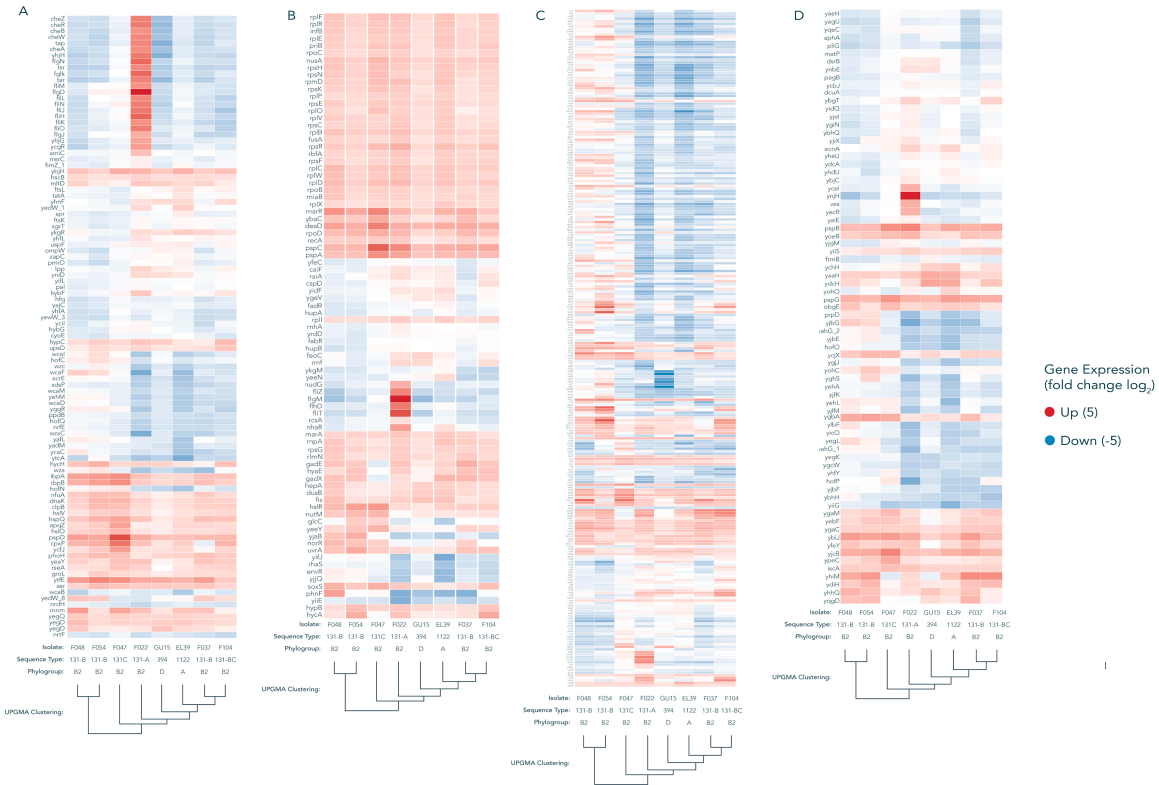

814

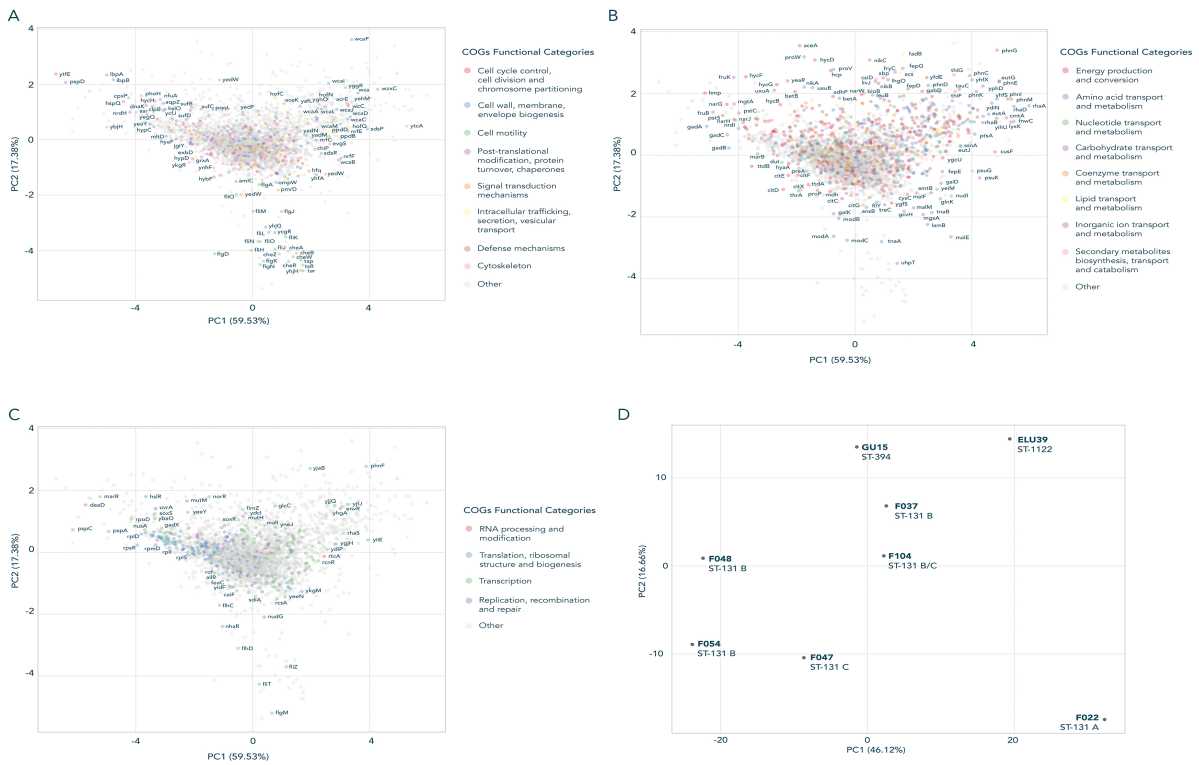

815

816
